# Supplementary material for: Ethical issues in the development and implementation of nutrition-related public health policies and interventions: A scoping review
Source: PLoS One. 2017 Oct 26;12(10):e0186897. doi: 10.1371/journal.pone.0186897 (PMC5658098; doi:10.1371/journal.pone.0186897)
Supplement: S2 Table — (XLSX) [file pone.0186897.s002.xlsx]

## Sheet: Feuil1
Authors	Year of publication	Title	Journal	# Ref in the article	Colonne1	Colonne2	Colonne3	Colonne4	Colonne5	Colonne6	Colonne7	Colonne8	Colonne9	Colonne10	Colonne11	Colonne12	Colonne13	Colonne14	Colonne15	Colonne16	Colonne17	Colonne18	Colonne19	Colonne20	Colonne21	Colonne22	Colonne23	Colonne24	Colonne25	Colonne26	Colonne27	Colonne28	Colonne29	Colonne30	Colonne31	Colonne32	Colonne33	Colonne34	Colonne35	Colonne36	Colonne37	Colonne38	Colonne39	Colonne40	Colonne41	Colonne42	Colonne43	Colonne44	Colonne45
Adams V, Craig SR, Samen A	2015	Alternative accounting in maternal and infant global health	Glob Public Health. 2015:1-19	182
Adler NE, Stewart J.	2009	Reducing obesity: motivating action while not blaming the victim	The Milbank Q. 2009;87:49-70	113
Ahlgren J, Nordgren A, Perrudin M, Ronteltap A, Savigny J, van Trijp H, et al	2013	Consumers on the Internet: ethical and legal aspects of commercialization of personalized nutrition	Genes Nutr. 2013;8:349-55	123
Al-Naggar RA, Chen R.	2011	Prevalence of vitamin-mineral supplements use and associated factors among young Malaysians	Asian Pac J Cancer Prev. 2011;12:1023-9	174
Aphramor L.	2010	Validity of claims made in weight management research: a narrative review of dietetic articles	Nutr J. 2010;9:3	105
Azétsop J, Joy TR	2013	Access to nutritious food, socioeconomic individualism and public health ethics in the USA: a common good approach	Philos Ethics Humanit Med. 2013;8:16	79
Barnhill A, King KF, Kass N, Faden R.	2014	The value of unhealthy eating and the ethics of healthy eating policies	Kennedy Inst Ethics J. 2014;24:187-217	65
Barnhill A, King KF.	2013	Evaluating equity critiques in food policy: the case of sugar-sweetened beverages	J Law Med Ethics. 2013;41:301-9	83
Barnhill A, King KF.	2013	Ethical Agreement and Disagreement about Obesity Prevention Policy in the United States	Int J Health Policy Manag. 2013;1:117-20	85
Barnhill A.	2011	Impact and ethics of excluding sweetened beverages from the SNAP program	Am J Public Health. 2011;101:2037-43	102
Barnhill A.	2013	Nutritionism, commercialization and food comment on "buying health: the costs of commercialism and an alternative philosophy"	Int J Health Policy Manag. 2013;1:223-5.	34
Barolia RI, Clark AM, Higginbottom GM.	2013	Protocol for a qualitative study on promoting dietary change and positive food choices for poor people with low income who experience cardiovascular disease in Pakistan	BMJ Open. 2013;3:e004176	124
Behrmann J.	2010	Ethical principles as a guide in implementing policies for the management of food allergies in schools	J Sch Nurs. 2010;26:183-93.	130
Benn CS.	2012	Combining vitamin A and vaccines: convenience or conflict?	Dan Med J. 2012;59:B4378	151
Bhatnagar N, Kaur R, Dudeja P.	2014	Food marketing to children in India: comparative review of regulatory strategies across the world	Indian J Pediatr. 2014;81:1187-92	70
Boddington P.	2010	Dietary choices, health, and freedom: hidden fats, hidden choices, hidden constraints	Am J Bioeth. 2010;10:43-4.	134
Bombak A.	2014	Obesity, health at every size, and public health policy	Am J Public Health. 2014;104:e60-7.	77
Botchey SA, Ouyang J, Vivekanantham S.	2015	Global water fluoridation: what is holding us back?	Altern Ther Health Med. 2015;21:46-52.	175
Breton E.	2013	[From behavior change to the improvement of living conditions. Toward ethical and effective health education]	Santé publique. 2013; 25:s119-23.	45
Brown AW, Allison DB.	2013	Unintended consequences of obesity-targeted health policy	Virtual Mentor. 2013;15:339-46.	84
Brown SL, Whiting D.	2014	The ethics of distress: toward a framework for determining the ethical acceptability of distressing health promotion advertising	Int J Psychol. 2014;49:89-97.	41
Brownell KD, Kersh R, Ludwig DS, Post RC, Puhl RM, Schwartz MB.	2010	Personal responsibility and obesity: a constructive approach to a controversial issue	Health Aff (Millwood]. 2010;29:379-87.	108
Brownell KD, Warner KE.	2009	The perils of ignoring history: Big Tobacco played dirty and millions died. How similar is Big Food?	The Milbank Q. 2009;87:259-94.	60
Bruyere O, Rizzoli R, Coxam V, Chevalier T, Fabien-Soulé V, Kanis JA, et al.	2012	Assessment of health claims in the field of bone: a view of the Group for the Respect of Ethics and Excellence in Science (GREES)	Osteoporos Int. 2012;23:193-9	127
Buchanan D.	2013	Ethical Standards to Guide the Development of Obesity Policies and Programs Comment on "Ethical Agreement and Disagreement about Obesity Prevention Policy in the United States"	Int J Health Policy Manag. 2013;1:313-5.	4
Calman K.	2009	Beyond the 'nanny state': stewardship and public health	Public health. 2009; 123:e6-e10	61
Camp KM, Trujillo E.	2014	Position of the Academy of Nutrition and Dietetics: nutritional genomics	J Acad Nutr Diet. 2014;114:299-312	118
Campbell N, Willis KJ, Arthur G, Jeffery B, Robertson HL, Lorenzetti DI.	2013	Federal government food policy committees and the financial interests of the food sector	Open Med. 2013;7:e107-11.	88
Capron AM.	2009	Learning from the past and looking to the future	J Nutrigenet Nutrigenomics. 2009;2:85-90	147
Chiu TH, Lin CL.	2009	Ethical management of food systems: plant based diet as a holistic approach	Asia Pac J Clin Nutr. 2009;18:647-53	110
Christian MD, Devereaux AV, Dichter JR, Rubinson L, Kissoon	2014	Introduction and executive summary: care of the critically ill and injured during pandemics and disasters: CHEST consensus statement	Chest. 2014;146:8s-34s.	22
Clarinval C, Biller-Andorno N.	2014	Challenging Operations: An Ethical Framework to Assist Humanitarian Aid Workers in their Decision-making Processes	PLoS Curr. 2014; doi: 10.1371/currents.dis.96bec99f13800a8059bb5b5a82028bbf	12
Connor SL.	2015	The role of sponsorship in achieving our mission	J Acad Nutr Diet. 2015;115:691	29
Cormier H, Tremblay BL, Paradis AM, Garneau V, Desroches S, Robitaille J.	2014	Nutrigenomics - perspectives from registered dietitians: a report from the Quebec-wide e-consultation on nutrigenomics among registered dietitians	J Hum Nutr Diet. 2014;27:391-400	119
Crawford PB, Gosliner W, Kayman H.	2011	The ethical basis for promoting nutritional health in public schools in the United States	Prev Chronic Dis. 2011;8:A98	98
Croney CC, Anthony R.	2011	Invited review: ruminating conscientiously: scientific and socio-ethical challenges for US dairy production	J Dairy Sci. 2011;94:539-46	179
Cronin GM, Rault JL, Glatz PC.	2014	Lessons learned from past experience with intensive livestock management systems	Rev Sci Tech. 2014;33:139-51	178
de Pee S, Grais R, Fenn B, Brown R, Briend A, Frize J, et al.	2015	Prevention of acute malnutrition: distribution of special nutritious foods and cash, and addressing underlying causes--what to recommend when, where, for whom, and how	Food Nutr Bull. 2015;36:S24-9	24
Deckers J.	2013	Obesity, public health, and the consumption of animal products: Ethical Concerns and Political Solutions	J Bioeth Inq. 2013;10:29-38	87
Desy M, Hughes D, Filiatrault F.	2014	Des pistes de solution pour une meilleure intégration des considérations éthiques en santé publique	Can J Public Health. 2014;105:e142-5	40
Deville K.	2010	Trans fat bans and the dynamic of public health regulation	Am J Bioeth. 2010;10:46-9	132
Di Renzo L, Colica C, Carraro A, Cenci Goga B, Tonino Marsella L, Botta R, et al.	2015	Food safety and nutritional quality for the prevention of non communicable diseases: the Nutrient, hazard Analysis and Critical Control Point process (NACCP)	J Transl Med. 2015;13:128	64
Dietz WH, Hunter AS.	2009	Legal preparedness for obesity prevention and control: the public health framework for action	J Law Med Ethics.2009;37 Suppl 1:9-14	112
Donegan S, Maluccio JA, Myers CK, Menon P, Ruel MT, Habicht JP.	2010	Two food-assisted maternal and child health nutrition programs helped mitigate the impact of economic hardship on child stunting in Haiti	J Nutr. 2010;140:1139-45	152
Dordevic AL, Bonham MP, Ware RS, Brennan L, Truby H.	2015	Study protocol: evaluation of 'JenMe', a commercially-delivered weight management program for adolescents: a randomised controlled trial	BMC Public Health. 2015;15:563	62
Elia M.	2009	The economics of malnutrition	Nestle Nutr Workshop Ser Clin Perform Programme. 2009;12:29-40	144
Elliot C.	2012	Marketing foods to children: are we asking the right questions?	Child Obes. 2012;8:191-4	91
Fahlquist JN.	2014	Experience of non-breastfeeding mothers: Norms and ethically responsible risk communication	Nurs Ethics. 2014;23:231-41	169
Fears R, ter Meulen V.	2013	The perspective from EASAC and FEAM on direct-to-consumer genetic testing for health-related purposes	Eur J Hum Genet. 2013;21:703-7	126
Fetherston CM, Leach JS #50	2012	Analysis of the ethical issues in the breastfeeding and bedsharing debate	Breastfeed Rev. 2012;20:7-17	171
Fledderjohann J, Agrawal S, Vellakkal S, Basu S, Campbell O, Doyle P, et al	2014	Do girls have a nutritional disadvantage compared with boys? Statistical models of breastfeeding and food consumption inequalities among Indian siblings	PloS One. 2014;9:e107172	153
Foltz JL, Belay B, Blackburn GL.	2013	Improving the Weight of the Nation by engaging the medical setting in obesity prevention and control	J Law Med Ethics. 2013;41 Suppl 2:19-26	72
Forman L.	2011	Making the case for human rights in global health education, research and policy	Can J Public Health 2011;102:207-9	55
Freedhoff Y.	2014	The food industry is neither friend, nor foe, nor partner	Obes Rev. 2014;15:6-8	76
Freudenberg N, McDonough J, Tsui E.	2011	Can a food justice movement improve nutrition and health? A case study of the emerging food movement in New York City	J Urban Health. 2011;88:623-36	100
Frewer LJ, Kleter GA, Brennan M, Coles D, Fischer ARH, Houdebine LM, et al.	2013	Genetically modified animals from life-science, socio-economic and ethical perspectives: examining issues in an EU policy context	N Biotechnol. 2013;30:447-60	178
Froh EB, Spatz DL.	2014	An ethical case for the provision of human milk in the NICU	Adv Neonatal Care. 2014;14:269-73	170
Fry CL.	2012	Ethical issues in obesity interventions for populations	NSW Public Health Bull. 2012;23:116-9	92
Gearhardt A, Roberts M, Ashe M.	2013	If sugar is addictive...what does it mean for the law?	J Law Med Ethics. 2013;41 Suppl 1:46-9	82
Gesser-Edelsburg A, Endevelt R, Tirosh-Kamienchick Y.	2014	Nutrition labelling and the choices logo in Israel: positions and perceptions of leading health policy makers	Hum Nutr Diet. 2014;27:58-68	81
Gholizadeh L, Yazdi K, Dehghan Nayeri N, Mohammadi E.	2015	Nutritional care of elderly patients in acute care settings: A qualitative study	Geriatr Gerontol Int. 2015; 16:374-9	154
Ghosh D.	2010	Personalised food: how personal is it?	Genes Nutr. 2010;5:51-3	145
Ghosh D.	2009	Future perspectives of nutrigenomics foods: benefits vs. risks	Indian J Biochem Biophys. 2009;46:31-6	148
Gibney MJ, Walsh MC.	2013	The future direction of personalised nutrition: my diet, my phenotype, my genes	Proc Nutr Soc. 2013;72:219-25	125
Gopichandran V, Indira Krishna AK.	2013	Monitoring 'monitoring' and evaluating 'evaluation': an ethical framework for monitoring and evaluation in public health	J Med Ethics. 2013;39:31-5	48
Gorman U, Mathers JC, Grimaldi KA, Ahlgren J, Nordström K.	2013	Do we know enough? A scientific and ethical analysis of the basis for genetic-based personalized nutrition	Genes Nutr. 2013;8:373-81	122
Gostin LO.	2010	Trans fat bans and the human freedom: a refutation	Am J Bioeth. 2010;10:33-4	139
Grais RF, Luquero FJ, Grellety E, Pham H, Coghlan B, Salignon P.	2009	Learning lessons from field surveys in humanitarian contexts: a case study of field surveys conducted in North Kivu, DRC 2006-2008	Confl Health. 2009;3:8	25
Greenway JC, Entwistle VA, ter Meulen R.	2013	Ethical tensions associated with the promotion of public health policy in health visiting: a qualitative investigation of health visitors' views	Prim Health Care Res Dev. 2013;14:200-11	51
Grill K, Dawson A.	2015	Ethical Frameworks in Public Health Decision-Making: Defending a Value-Based and Pluralist Approach	Health Care Analysis. 2015;1-17	36
Gupta A, Holla R, Suri S.	2015	Conflict of interest in public health: should there be a law to prevent it?	Indian J Med Ethics. 2015;12:172-7	28
Hall SJ, Hilborn R, Andrew NL, Allisonc EH.	2013	Innovations in capture fisheries are an imperative for nutrition security in the developing world	Proc Natl Acad Sci USA. 2013;110:8393-8	155
Hannan-Jones M, Capra S.	2015	Prevalence of diet-related risk factors for chronic disease in male prisoners in a high secure prison	Eur J Clin Nutr. 2015;70:212-6	115
Heinrich KM, Stephen MO, Vaughan KB, Kellogg M.	2013	Kansas legislators prioritize obesity but overlook nutrition and physical activity issues	J Public Health Manag Pract. 2013;19:139-45	86
Herman J.	2010	Saving U.S. dietary advice from conflicts of interest	Food Drug Law J. 2010;65:285-316, ii	141
Hernandez VR, Montana S, Clarke K.	2010	Child health inequality: framing a social work response	Health Soc Work. 2010;35:291-301	56
Hilmers A, Hilmers DC, Dave J.	2012	Neighborhood disparities in access to healthy foods and their effects on environmental justice	Am J Public Health. 2012;102:1644-54	90
Hirani SA, Karmaliani R, Christie T, Parpio Y, Rafique G.	2013	Perceived Breastfeeding Support Assessment Tool (PBSAT): development and testing of psychometric properties with Pakistani urban working mothers	Midwifery. 2013;29:599-607	172
Hoffman SR, Stallings SF, Bessinger RC, Brooks GT.	2013	Differences between health and ethical vegetarians. Strength of conviction, nutrition knowledge, dietary restriction, and duration of adherence	Appetite. 2013;65:39-44	33
Isanaka S, Grais RF, Briend A, Checchi F.	2011	Estimates of the duration of untreated acute malnutrition in children from Niger	Am J Epidemiol. 2011;173:932-40	156
Jain A.	2010	Temptations in cyberspace: new battlefields in childhood obesity	Health Aff (Millwood]. 2010;29:425-9	107
Johnson C, Mohan S, Praveen D, Woodward M, Maulik PK, Shivashankar R, et al.	2014	Protocol for developing the evidence base for a national salt reduction programme for India	BMJ Open. 2014;4:e006629	116
Johri M, Chung R, Dawson A, Schrecker T.	2012	Global health and national borders: the ethics of foreign aid in a time of financial crisis	Global Health. 2012;8:19. doi: 10.1186/1744-8603-8-19	52
Joy P, Mann L, Blotnicky K.	2014	Identification of Healthy Eating and Active Lifestyle Issues through Photo Elicitation	Can J Diet Pract Res. 2014;75:152-6	31
Kass N, Hecht K, Paul A, Birnbach K.	2014	Ethics and obesity prevention: ethical considerations in 3 approaches to reducing consumption of sugar-sweetened beverages	Am J Public Health. 2014;104:787-95	3
Kaye HL, Moreno-Leguizamon CJ.	2010	Nutrition education and counselling as strategic interventions to improve health outcomes in adult outpatients with HIV: a literature review	Afr J AIDS Res. 2010;9:271-83	26
Keane M.	2010	Public health interventions need to meet the same standards of medical ethics as individual health interventions	Am J Bioeth. 2010;10:36-8	137
Kersh R, Stroup DF, Taylor WC.	2011	Childhood obesity: a framework for policy approaches and ethical considerations	Prev Chronic Dis. 2011;8:A93	99
Kirkwood K.	2010	Lipids, liberty, and the integrity of free actions	Am J Bioeth. 2010;10:45-6	133
Klein EP.	2014	Patient health incentives: ethical challenges and frameworks	Int J Behav Med. 2014;21:995-1004	46
Knebel AR, Sharpe VA, Danis M, Toomey LM, Knickerbocker DK.	2014	Informing the gestalt: an ethical framework for allocating scarce federal public health and medical resources to states during disasters	Disaster Med Public Health Prep. 2014; 8:79-88	23
Komduur RH, Korthals M, te Molder H.	2009	The good life: living for health and a life without risks? On a prominent script of nutrigenomics	Br J Nutr. 2009;101:307-16	150
Korthals M.	2011	Coevolution of nutrigenomics and society: ethical considerations	Am J Clin Nutr. 2011;94:2025s-9s	94
Kraak VI, Harrigan PB, Lawrence M, Harrison PJ, Jackson MA, Swinburn B.	2012	Balancing the benefits and risks of public-private partnerships to address the global double burden of malnutrition	Public Health Nutr. 2012;15:503-17	96
Kregg-Byers CM, Schlenk EA.	2010	Implications of food insecurity on global health policy and nursing practice	J Nurs Scholarship. 2010;42:278-85	104
Labonté R.	2014	Health in All (Foreign) Policy: challenges in achieving coherence	Health Promot Int. 2014;29 Suppl 1:i48-58	30
Lachat C, Nago E, Roberfroid D, Holdsworth M, Smit K, Kinabo J, et al.	2014	Developing a sustainable nutrition research agenda in sub-Saharan Africa--findings from the SUNRAY project	PLoS Med. 2014;11:e1001593	157
Leitzmann C.	2014	Vegetarian nutrition: past, present, future	Am J Clin Nutr. 2014;100 Suppl 1:496s-502s	117
Lessen R, Kavanagh K.	2015	Position of the academy of nutrition and dietetics: promoting and supporting breastfeeding	J Acad Nutr Diet. 2015;115:444-9	168
Lewis KH, Rosenthal MB	2011	Individual responsibility or a policy solution--cap and trade for the U.S. diet?	N Engl J Med. 2011;365:1561-3	95
Liu L.	2012	Reshaping the American concept of consumer interest in the food policy debate	Yale J Health Policy Law Ethics. 2012;12:171-207	93
Lobanenkov V, Loukinov D, Pugacheva E.	2011	Environmental epigenomics and disease susceptibility. Keystone symposia on molecular and cellular biology. The Grove Park Hotel & Spa, Ashville, NC, USA, 27 March-1 April 2011	Epigenomics. 2011;3:261-6.	128
Maher JH, Lowe J, Hughes R.	2015	Community pharmacy as a setting for public health nutrition action: Australian nutritionists' perspectives	Public Health Nutr. 2015;18:1864-72.	67
Maki KC, Slavin JL, Rains TM, Kris-Etherton PM.	2014	Limitations of observational evidence: implications for evidence-based dietary recommendations	Adv Nutr. 2014;5:7-15	74
Mamhidir AG, Kihlgren M, Soerlie V.	2010	Malnutrition in elder care: qualitative analysis of ethical perceptions of politicians and civil servants	BMC Med Ethics. 2010;11:11	158
Mann J, Nye ER.	2009	Fad diets in Sweden, of all places	Lancet. 2009;374:767-9	146
Martin GB.	2014	An Australasian perspective on the role of reproductive technologies in world food production	Adv Exp Med Biol. 2014;752:181-97	177
Massé R.	2012	[Specialist and lay ethical expertise in public health: issues and challenges for discourse ethics]	Santé publique. 2012;24:49-61	53
McPhail D, Chapman GE, Beagan BL.	2011	Too much of that stuff can't be good: Canadian teens, morality, and fast food consumption	Soc Sci Med. 2011;73:301-7	101
Merritt RJ, Goldsmith AH.	2014	Scientific, economic, regulatory, and ethical challenges of bringing science-based pediatric nutrition products to the U.S. market and ensuring their availability for patients	JPEN J Parenter Enteral Nutr. 2014;38:17s-34s	173
Mishra S.	2012	Hunger, ethics and the right to food	Indian J Med Ethics. 2012; 9:32-7	159
Moore S, Murphy S, Tapper K, Moore L.	2010	From policy to plate: barriers to implementing healthy eating policies in primary schools in Wales	Health Policy. 2010;94:239-45	111
Morin K.	2009	Knowledge and attitudes of Canadian consumers and health care professionals regarding nutritional genomics	OMICS. 2009;13:37-41	149
Mubeen SM, Mansoor S, Hussain A, Quadir S.	2012	Perceptions and practices of fasting in Ramadan during pregnancy in Pakistan	Iran J Nurs Midwifery Res. 2012;17:467-71	32
Muslu GK, Beytut D, Kahraman A, Yardımcı F, Başbakkal Z.	2014	Nutritional style of parents and examination of the effective factors	Turk Pediatri Ars. 2014;49:224-30	63
Nestle M.	2013	Conflicts of interest in the regulation of food safety: a threat to scientific integrity	JAMA Intern Med. 2013;173:2036-8	184
Nobis N, Gardner M.	2010	Cut the fat! Defending trans fats bans	Am J Bioeth. 2010;10:39-40	136
Nordstrom K, Coff C, Jonsson H, Nordenfelt L, Görman U.	2013	Food and health: individual, cultural, or scientific matters?	Genes Nutr. 2013;8:357-63	120
Nordstrom K, Juth N, Kjellstrom S, Meijboom FLB, Görmanon U, the Food4Me project	2013	Values at stake: autonomy, responsibility, and trustworthiness in relation to genetic testing and personalized nutrition advice	Genes Nutr. 2013;8:365-72	121
Okafor CI, Gezawa ID, Sabir AA, Raimi TH, Enang O.	2014	Obesity, overweight, and underweight among urban Nigerians	Niger J Clin Pract. 2014;17:743-9	66
Oliver SP, Patel DA, Callaway TR, Torrence ME.	2009	ASAS Centennial Paper: Developments and future outlook for preharvest food safety	J Anim Sci. 2009;87:419-37	183
Oppenheimer GM, Benrubi ID.	2014	McGovern's Senate Select Committee on Nutrition and Human Needs versus the meat industry on the diet-heart question (1976-1977)	Am J Public Health. 2014;104:59-69	78
Pérez-Escamilla R.	2012	Can experience-based household food security scales help improve food security governance?	Glob Food Sec. 2012;1:120-5	160
Pickett KE, Wilkinson RG.	2015	The ethical and policy implications of research on income inequality and child well-being	Pediatrics. 2015;135 Suppl 2:S39-47	37
Pinard CA, Kim SA, Story M, Yaroch AL.	2013	The food and water system: impacts on obesity	J Law Med Ethics. 2013;41 Suppl 2:52-60	71
Popkin BM.	2013	Bellagio Declaration 2013: countering Big Food's undermining of healthy food policies	Obes Rev. 2013;14 Suppl 2:9-10	80
Power EM, Little MH, Collins PA.	2015	Should Canadian health promoters support a food stamp-style program to address food insecurity?	Health Promot Int. 2015;30:184-93	68
Purcell M.	2010	Raising healthy children: Moral and political responsibility for childhood obesity	J Public Health Policy. 2010;31:433-46	103
Resnik D.	2010	Trans fat bans and human freedom	Am J Bioeth. 2010;10:27-32	131
Resnik D.	2010	Response to open peer commentaries on "Trans fat bans and human freedom"	Am J Bioeth. 2010;10:W4-5	140
Reynolds MA, Jackson Cotwright C, Polhamus B, Gertel-Rosenberg A, Chang D.	2013	Obesity prevention in the early care and education setting: successful initiatives across a spectrum of opportunities	J Law Med Ethics. 2013;41 Suppl 2:8-18	73
Riiser K, Londal K, Ommundsen Y, Misvær N, Helseth S.	2015	Targeting and tailoring an intervention for adolescents who are overweight: some ethical concerns	Nursing ethics. 2015;22:237-47	2
Rodota S.	2010	The right to secure food in the perspective of the general improvement of the fundamental rights	Rev Derecho Genoma Hum. 2010;33:13-9	161
Rowe S, Alexander N, Weaver CM, Dwyer JT, Drew C, Applebaum RS, et al, for the International Life Sciences Institute (ILSI] North America Conflict of Interest Working Group.	2013	How experts are chosen to inform public policy: can the process be improved?	Health Policy. 2013;112:172-8	27
Rubel A.	2010	Local trans fat bans and consumer autonomy	Am J Bioeth. 2010;10:41-2	135
Rubens CE, Gravett MG, Victora CG, Rubens CE, Stanton C, the GAPPS Review Group.	2010	Global report on preterm birth and stillbirth (7 of 7): mobilizing resources to accelerate innovative solutions (Global Action Agenda)	BMC Pregnancy Childbirth. 2010;10 Suppl 1:S7	58
Ruger JP	2012	Global health governance as shared health governance	J Epidemiol Community Health. 2012;66:653-61	54
Rusconi M, Conti A.	2010	Theobroma cacao L., the Food of the Gods: a scientific approach beyond myths and claims	Pharmacol Res. 2010;61:5-13	35
Russell CG, Worsley A, Liem DG.	2015	Parents' food choice motives and their associations with children's food preferences	Public Health Nutr. 2015;18:1018-27	69
Salmon L.	2015	Food security for infants and young children: an opportunity for breastfeeding policy?	Int Breastfeed J. 2015;10:7	162
Sather M, Fajon AV, Zaentz R, Rubens CE, the GAPPS Review Group.	2010	Global report on preterm birth and stillbirth (5 of 7): advocacy barriers and opportunities	BMC pregnancy and childbirth. 2010; 10 Suppl 1:S5	59
Saukko PM, Reed M, Britten N, Hogarth S	2010	Negotiating the boundary between medicine and consumer culture: online marketing of nutrigenetic tests	Soc Sci Med. 2010; 70:744-53	142
Schmitz BA, Moreira EA, Freitas MB, Fiates GM, Gabriel CG, Fagundes RL.	2011	Public intervention in food and nutrition in Brazil	Arch Latinoam Nutr. 2011;61:361-6	163
Schroder-Back P, Clemens T, Michelsen K, Schulte in den Bäumen T, Sørensen K, Borrett G, et al.	2012	Public health ethical perspectives on the values of the European Commission's White Paper "Together for Health"	Cent Eur J Public Health. 2012;20:95-100	50
Schuftan C.	2009	Making nutrition and health more equitable within inequitable societies	Public Health Nutr. 2009;12:137-8	181
Shrimpton R.	2012	Global policy and programme guidance on maternal nutrition: what exists, the mechanisms for providing it, and how to improve them?	Paediatr Perinat Epidemiol. 2012;26 Suppl 1:315-25	164
Singer PA, Ansett S, Sagoe-Moses I.	2011	What could infant and young child nutrition learn from sweatshops?	BMC Public Health. 2011;11:276	165
Singh JA, Daar AS, Singer PA.	2010	Shared principles of ethics for infant and young child nutrition in the developing world	BMC Public Health. 2010;10:321	166
Stapleton G, Schroder-Back P, Laaser U, Meershoek A, Popa D.	2014	Global health ethics: an introduction to prominent theories and relevant topics	Glob Health Action. 2014;7:23569	44
Tait CL.	2013	Resituating the ethical gaze: government morality and the local worlds of impoverished Indigenous women	Int J Circumpolar Health. 2013;72. doi: 10.3402/ijch.v72i0.21207. eCollection 2013	47
Ten Have M, de Beaufort ID, Mackenbach JP, van der Heide A.	2010	An overview of ethical frameworks in public health: can they be supportive in the evaluation of programs to prevent overweight?	BMC Public Health. 2010; 10:638	57
Ten Have M, van der Heide A, Mackenbach JP, de Beaufort ID.	2013	An ethical framework for the prevention of overweight and obesity: a tool for thinking through a programme's ethical aspects	Eur J Public Health. 2013;23:299-305	89
Ten Have M.	2014	Ethical aspects of obesity prevention	Best Pract Res Clin Gastroenterol. 2014;28:303-14	1
Thomson G, Morgan H, Crossland N, Bauld L, Dykes F, Hoddinott P.	2014	Unintended consequences of incentive provision for behaviour change and maintenance around childbirth	PloS One. 2014;9:e111322	38
Trovato FM, Catalano D, Musumeci G, Trovato GM.	2014	4Ps medicine of the fatty liver: the research model of predictive, preventive, personalized and participatory medicine-recommendations for facing obesity, fatty liver and fibrosis epidemics	EPMA J. 2014;5:21	75
Valles SA.	2012	Heterogeneity of risk within racial groups, a challenge for public health programs	Prev Med. 2012;55:405-8	49
Vallgarda S.	2014	Ethics, equality and evidence in health promotion Danish guidelines for municipalities	Scand J Public Health. 2014;42:337-43	43
von Braun J.	2010	Food insecurity, hunger and malnutrition: necessary policy and technology changes	N Biotechnol. 2010;27:449-52	167
Wahlqvist ML, Keatinge JD, Butler CD, Friel Sh,McKay J, Easdown W, et al.	2009	A Food in Health Security (FIHS) platform in the Asia-Pacific Region: the way forward	Asia Pac J Clin Nutr. 2009;18:688-702	109
Weale A.	2010	Ethical arguments relevant to the use of GM crops	N Biotechnol.2010;27:582-7	180
Weir M, Morin K, Ries N, Castle D.	2010	Canadian health care professionals' knowledge, attitudes and perceptions of nutritional genomics	Br J Nutr. 2010;104:1112-9	129
Whalqvist ML.	2009	Why food in health security (FIHS)?	Asia Pac J Clin Nutr. 2009;18:480-5	143
Wickins-Drazilova D, Williams G.	2010	Ethical and public policy aspects of childhood obesity: opinions of scientists working on an intervention study	Obes Rev. 2010;11:620-6	106
Wilde P.	2009	Self-regulation and the response to concerns about food and beverage marketing to children in the United States	Nutr Rev. 2009;67:155-66	114
Williamson L.	2014	Patient and citizen participation in health: the need for improved ethical support	Am J Bioeth. 2014; 14:4-16	42
Willison DJ, Ondrusek N, Dawson A, Emerson C, Ferris LE, Saginur R, et al.	2014	What makes public health studies ethical? Dissolving the boundary between research and practice	BMC Med Ethics. 2014;15:61	39
Wilson J, Dawson A.	2010	Giving liberty its due, but no more: trans fats, liberty, and public health	Am J Bioeth. 2010;10:34-6	138
Yach D.	2014	Food industry: friend or foe?	Obes Rev. 2014;15:2-5	185
Yang YT, Nichols LM.	2011	Obesity and health system reform: private vs. public responsibility	J Law Med Ethics. 2011;39:380-6	97
[truncated: 5,000 more columns]
